# Supplementary figures and images for: Cannabinoids reduce ErbB2-driven breast cancer progression through Akt inhibition
Source: Springer Nature journal article supplement (doi:10.1186/1476-4598-9-196), 2010-07-22

**A**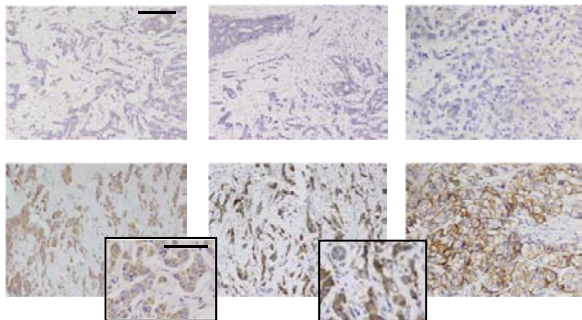**B**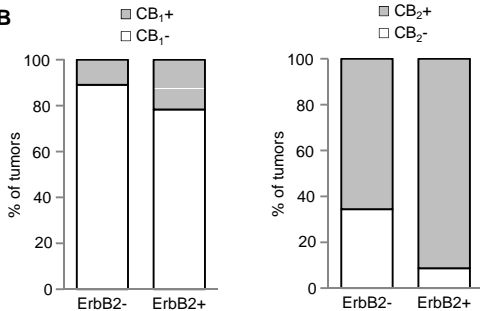

Supplement: 12943_2010_711_MOESM2_ESM.pdf [file 12943_2010_711_MOESM2_ESM.pdf]
